# Supplementary material
Source: PubMed Central journal article supplement (PMC7965066)
Supplement: sbaa145_suppl_supplementary_figure_3.pdf [file sbaa145_suppl_supplementary_figure_3.pdf]

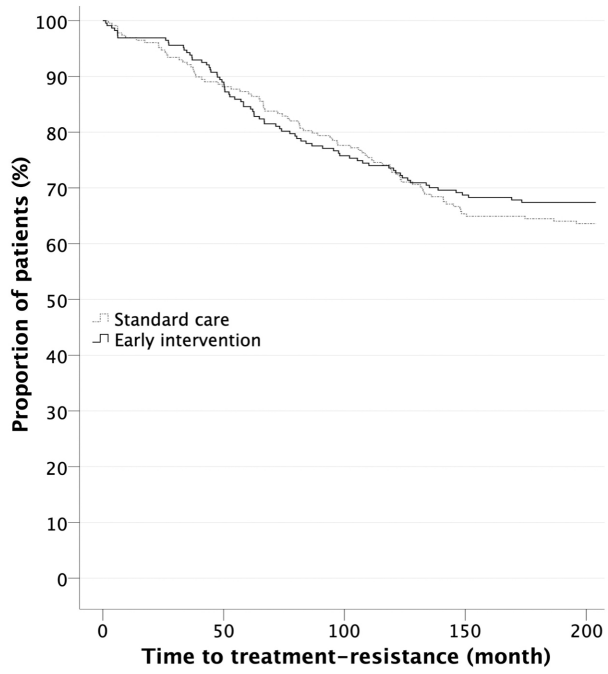

Supplementary Figure 3. Kaplan-Meier survival plot for time to treatment-resistance in standard care and early intervention cohorts.
